# Supplementary material
Source: ML conference proceedings conference paper supplement (https://openaccess.thecvf.com/content/CVPR2022/html/Yoo_Deep_3D-to-2D_Watermarking_CVPR_2022_paper.html)
Supplement: Supplementary file 2 [file Yoo_Deep_3D-to-2D_Watermarking_CVPR_2022_supplemental.zip]

Archive with 2 entries (2 files):
- 09396_supp.pdf
- 09396_video.mp4
